# Supplementary material for: Implementation, Mechanisms and Context of the MAMAACT Intervention to Reduce Ethnic and Social Disparity in Stillbirth and Infant Health
Source: MDPI journal article supplement (doi:10.3390/ijerph18168583), 2021-08-14
Supplement: s1 [file s1]

**Supplementary table S2.** Process evaluation questions on the use of the MAMA ACT leaflet and app per cluster in the intervention group, from the MAMA ACT post-implementation cross-sectional survey, 2019

|                                                                                                                                           | W1 <sup>a</sup> | W2 <sup>a</sup> | W3 <sup>a</sup> | W4 <sup>a</sup> | W5 <sup>a</sup> | W6 <sup>a</sup> | W7 <sup>a</sup> | W8 <sup>a</sup> | W9 <sup>a</sup> | W10 <sup>a</sup> |
|-------------------------------------------------------------------------------------------------------------------------------------------|-----------------|-----------------|-----------------|-----------------|-----------------|-----------------|-----------------|-----------------|-----------------|------------------|
|                                                                                                                                           | N=135<br>(100)  | N=93<br>(100)   | N=117<br>(100)  | N=156<br>(100)  | N=120<br>(100)  | N= 125<br>(100) | N= 124<br>(100) | N=122<br>(100)  | N=156<br>(100)  | N=156<br>(100)   |
| <b>Did the midwife give you the leaflet “MAMA ACT”?</b>                                                                                   |                 |                 |                 |                 |                 |                 |                 |                 |                 |                  |
| <i>Yes</i>                                                                                                                                | 114 (84.4)      | 84 (90.3)       | 87 (74.4)       | 123 (78.8)      | 86 (71.7)       | 92 (73.6)       | 109 (87.9)      | 101 (82.8)      | 127 (81.4)      | 128 (82.1)       |
| <i>No</i>                                                                                                                                 | 19 (14.1)       | 6 (6.5)         | 25 (21.4)       | 31 (19.9)       | 31 (25.8)       | 29 (23.2)       | 15 (12.1)       | 18 (14.7)       | 26 (16.7)       | 27 (17.3)        |
| <i>Unanswered</i>                                                                                                                         | 2 (1.5)         | 3 (3.2)         | 5 (4.3)         | 2 (1.3)         | 3 (2.5)         | 4 (3.2)         | 0 (0.0)         | 3 (2.5)         | 3 (1.9)         | 1 (0.6)          |
| <b>Did the leaflet provide you with information about body signals that you have been able to use during your pregnancy? <sup>b</sup></b> |                 |                 |                 |                 |                 |                 |                 |                 |                 |                  |
| <i>Yes</i>                                                                                                                                | 64 (55.2)       | 38 (43.7)       | 45 (48.9)       | 66 (52.8)       | 36 (40.5)       | 40 (41.7)       | 58 (53.2)       | 46 (44.2)       | 60 (46.2)       | 69 (53.5)        |
| <i>No</i>                                                                                                                                 | 31 (26.7)       | 30 (34.5)       | 18 (19.6)       | 19 (15.2)       | 25 (28.1)       | 28 (29.2)       | 23 (21.1)       | 24 (23.1)       | 34 (26.2)       | 34 (26.4)        |
| <i>Have not read the leaflet</i>                                                                                                          | 19 (16.4)       | 13 (14.9)       | 25 (27.2)       | 39 (31.2)       | 26 (29.2)       | 26 (27.1)       | 27 (24.8)       | 30 (28.9)       | 34 (26.1)       | 25 (19.4)        |
| <i>Unanswered</i>                                                                                                                         | 2 (1.7)         | 6 (6.9)         | 4 (4.4)         | 1 (0.8)         | 2 (2.2)         | 2 (2.1)         | 1 (0.9)         | 4 (3.8)         | 2 (1.5)         | 1 (0.7)          |
| <i>Missing</i>                                                                                                                            | 19              | 6               | 25              | 31              | 31              | 29              | 15              | 18              | 26              | 27               |
| <b>Did you download the app “MAMA ACT”? <sup>b</sup></b>                                                                                  |                 |                 |                 |                 |                 |                 |                 |                 |                 |                  |
| <i>Yes</i>                                                                                                                                | 33 (28.4)       | 44 (50.6)       | 23 (25.0)       | 24 (19.2)       | 17 (19.1)       | 10 (10.4)       | 19 (17.4)       | 13 (12.5)       | 33 (25.4)       | 35 (27.1)        |
| <i>No</i>                                                                                                                                 | 82 (70.7)       | 41 (47.1)       | 65 (70.6)       | 101 (80.8)      | 70 (78.6)       | 85 (88.5)       | 90 (82.6)       | 88 (84.6)       | 95 (73.1)       | 94 (72.9)        |
| <i>Unanswered</i>                                                                                                                         | 1 (0.9)         | 2 (2.3)         | 4 (4.4)         | 0 (0.0)         | 2 (2.3)         | 1 (1.1)         | 0 (0.0)         | 3 (2.9)         | 2 (1.5)         | 0 (0.0)          |
| <i>Missing</i>                                                                                                                            | 19              | 6               | 25              | 31              | 31              | 29              | 15              | 18              | 26              | 27               |
| <b>Why did you not download the app? You can choose between one of the following four options: <sup>c</sup></b>                           |                 |                 |                 |                 |                 |                 |                 |                 |                 |                  |
| <i>The MAMA ACT leaflet was sufficient</i>                                                                                                | 21 (25.3)       | 6 (14.0)        | 7 (10.1)        | 22 (21.8)       | 15 (20.8)       | 16 (18.6)       | 25 (27.8)       | 17 (18.7)       | 22 (22.6)       | 23 (24.5)        |
| <i>You did not have a smartphone to install it on</i>                                                                                     | 1 (1.2)         | 1 (2.3)         | 3 (4.3)         | 1 (1.0)         | 0 (0.0)         | 1 (1.2)         | 1 (1.1)         | 1 (1.1)         | 1 (1.0)         | 2 (2.1)          |
| <i>It was difficult to find or install</i>                                                                                                | 1 (1.2)         | 1 (2.3)         | 3 (4.4)         | 2 (2.0)         | 2 (2.8)         | 0 (0.0)         | 2 (2.2)         | 1 (1.1)         | 1 (1.0)         | 2 (2.1)          |
| <i>It was irrelevant; please elaborate</i>                                                                                                | 55 (66.3)       | 31 (72.1)       | 51 (73.9)       | 76 (75.2)       | 51 (70.8)       | 66 (76.7)       | 61 (67.8)       | 69 (75.8)       | 69 (71.1)       | 66 (70.2)        |
| <i>Unanswered</i>                                                                                                                         | 5 (6.0)         | 4 (9.3)         | 5 (7.3)         | 0 (0.0)         | 4 (5.6)         | 3 (3.5)         | 1 (1.1)         | 3 (3.3)         | 4 (4.1)         | 1 (1.1)          |
| <i>Missing</i>                                                                                                                            | 52              | 50              | 48              | 55              | 48              | 39              | 34              | 31              | 59              | 62               |
| <b>It was irrelevant; please elaborate <sup>d</sup></b>                                                                                   |                 |                 |                 |                 |                 |                 |                 |                 |                 |                  |
| <i>Forgot to download the app</i>                                                                                                         | 8 (14.6)        | 8 (25.8)        | 9 (17.6)        | 16 (21.0)       | 6 (11.8)        | 13 (19.7)       | 7 (11.5)        | 13 (18.8)       | 13 (18.8)       | 9 (13.6)         |
| <i>Did not use the app due to technical problems</i>                                                                                      | 1 (1.8)         | 2 (6.5)         | 0 (0.0)         | 1 (1.3)         | 0 (0.0)         | 1 (1.5)         | 2 (3.3)         | 1 (1.5)         | 0 (0.0)         | 2 (3.0)          |
| <i>Woman herself or partner works within healthcare</i>                                                                                   | 1 (1.8)         | 0 (0.0)         | 1 (2.0)         | 0 (0.0)         | 1 (2.0)         | 3 (4.6)         | 1 (1.6)         | 1 (1.5)         | 1 (1.5)         | 3 (4.6)          |
| <i>Lost or did not read the leaflet</i>                                                                                                   | 9 (16.4)        | 4 (12.9)        | 14 (27.5)       | 19 (25.0)       | 15 (29.4)       | 18 (26.9)       | 15 (24.6)       | 15 (21.7)       | 19 (27.5)       | 17 (25.8)        |
| <i>Did not have time/ surplus to get acquainted with the app</i>                                                                          | 0 (0.0)         | 2 (6.4)         | 1 (2.0)         | 1 (1.3)         | 3 (5.9)         | 2 (3.0)         | 0 (0.0)         | 0 (0.0)         | 3 (4.4)         | 0 (0.0)          |
| <i>Use other apps</i>                                                                                                                     | 3 (5.5)         | 2 (6.5)         | 4 (7.8)         | 5 (6.6)         | 2 (3.9)         | 5 (7.6)         | 2 (3.3)         | 5 (7.3)         | 4 (5.8)         | 3 (4.6)          |
| <i>Felt no need for the app (partly due to knowledge from previous pregnancy)</i>                                                         | 13 (23.6)       | 8 (25.8)        | 10 (19.6)       | 14 (18.4)       | 12 (23.5)       | 12 (18.2)       | 14 (22.9)       | 9 (13.0)        | 14 (20.3)       | 19 (28.8)        |
| <i>Did not know there was an app</i>                                                                                                      | 16 (29.1)       | 3 (9.7)         | 8 (15.7)        | 17 (22.4)       | 9 (17.6)        | 7 (10.6)        | 16 (26.2)       | 18 (26.1)       | 10 (14.5)       | 7 (10.6)         |
| <i>Other reasons</i>                                                                                                                      | 4 (7.2)         | 2 (6.4)         | 4 (7.8)         | 3 (4.0)         | 3 (5.9)         | 5 (7.6)         | 4 (6.6)         | 7 (10.1)        | 5 (7.2)         | 6 (9.1)          |
| <i>Missing</i>                                                                                                                            | 80              | 62              | 66              | 80              | 69              | 59              | 63              | 53              | 87              | 90               |
| <b>Did the app provide you with information about body signals that you have been able to use during your pregnancy? <sup>e</sup></b>     |                 |                 |                 |                 |                 |                 |                 |                 |                 |                  |
| <i>Yes</i>                                                                                                                                | 23 (67.7)       | 14 (30.4)       | 17 (63.0)       | 14 (58.3)       | 8 (42.1)        | 6 (54.5)        | 11 (57.9)       | 11 (68.8)       | 20 (57.1)       | 23 (65.7)        |

|                              |          |           |          |          |          |          |          |          |          |          |
|------------------------------|----------|-----------|----------|----------|----------|----------|----------|----------|----------|----------|
| <i>No</i>                    | 7 (20.6) | 17 (37.0) | 3 (1.1)  | 5 (20.8) | 4 (21.1) | 2 (18.2) | 5 (26.3) | 0 (0.0)  | 8 (22.9) | 5 (14.3) |
| <i>Have not used the app</i> | 3 (8.8)  | 13 (28.3) | 3 (1.1)  | 5 (20.8) | 3 (15.8) | 2 (18.2) | 3 (15.8) | 3 (18.7) | 5 (14.3) | 7 (20.0) |
| <i>Unanswered</i>            | 1 (2.9)  | 2 (4.3)   | 4 (14.8) | 0 (0.0)  | 4 (21.0) | 1 (9.1)  | 0 (0.0)  | 2 (12.5) | 2 (5.7)  | (0.0)    |

<sup>a</sup> Anonymized names of the ten maternity wards (clusters) included in the intervention group

<sup>b</sup> Percentages are based on the total of women answering 'yes' to or not answering the question: Did the midwife give you the leaflet "MAMA ACT"?

<sup>c</sup> Percentages are based on the total of women answering 'no' to or not answering the question: Did you download the app "MAMA ACT"?

<sup>d</sup> Percentages are based on the total of women answering 'It was irrelevant; please elaborate' to the question: Why did you not download the app?

<sup>e</sup> Percentages are based on the total of women answering 'yes' to or not answering the question: Did you download the app "MAMA ACT"?
