# Supplementary material for: Implementation, Mechanisms and Context of the MAMAACT Intervention to Reduce Ethnic and Social Disparity in Stillbirth and Infant Health
Source: MDPI journal article supplement (doi:10.3390/ijerph18168583), 2021-08-14
Supplement: s1 [file s1]

| Table S1. Process evaluation components, research questions and data sources |                                                                                                                                                                    |                                                                                              |
|------------------------------------------------------------------------------|--------------------------------------------------------------------------------------------------------------------------------------------------------------------|----------------------------------------------------------------------------------------------|
|                                                                              | Research questions                                                                                                                                                 | Data sources                                                                                 |
| <b>Implementation</b>                                                        |                                                                                                                                                                    |                                                                                              |
| <i>Reach</i>                                                                 | What proportion of antenatal care (ANC) midwives attended the training session?                                                                                    | Lists of ANC midwives and participant lists                                                  |
|                                                                              | How many midwives attended the dialogue meetings?                                                                                                                  | Project midwives records from all dialogue meetings                                          |
|                                                                              | How many women received the leaflet?                                                                                                                               | Survey data                                                                                  |
| <i>Dose</i>                                                                  | How many leaflets were given to each hospital?                                                                                                                     | Administrative data on the number of received printed leaflets                               |
|                                                                              | Did the leaflet provide new information about body signals?                                                                                                        | Survey data                                                                                  |
|                                                                              | How many downloaded the app?                                                                                                                                       | Survey data and administrative data on app downloads                                         |
|                                                                              | What were the main reasons for not downloading the app?                                                                                                            | Survey data                                                                                  |
|                                                                              | Did the app provide new information about body signals?                                                                                                            | Survey data                                                                                  |
| <i>Fidelity</i>                                                              | How did midwives reflect on the integration of knowledge gained from the training session into daily practice?                                                     | Project midwives records from all dialogue meetings                                          |
|                                                                              | What did midwives discuss?<br>How did they discuss the use of the leaflet in daily practice?                                                                       | Project midwives records from all dialogue meetings                                          |
|                                                                              | How did midwives use the leaflet in daily practice to talk about body symptoms of pregnancy complications?                                                         | Sum-up of a qualitative study by Johnsen et al. 2021 [31]                                    |
| <b>Mechanisms of impact</b>                                                  |                                                                                                                                                                    |                                                                                              |
| Participant responses to the intervention                                    | What were the midwives' experiences with the training session?                                                                                                     | Sum-up of a qualitative study by Johnsen et al. 2021 [31]                                    |
|                                                                              | What were the midwives' experiences with the dialogue meetings?                                                                                                    | Sum-up of a qualitative study by Johnsen et al. 2021 [31]                                    |
|                                                                              | How did women react to the MAMA ACT leaflet and app?                                                                                                               | Sum-up of a qualitative study by Johnsen et al. 2021 [31]                                    |
| <b>Contextual factors</b>                                                    |                                                                                                                                                                    |                                                                                              |
|                                                                              | Where there other important processes affecting ANC at interventions and control sites affecting communication on pregnancy warning signs during the trial period? | Information sheets from maternity wards on organizational inputs and other research projects |
|                                                                              | How do barriers in non-Western immigrant women's everyday life situations affect responses to pregnancy complications?                                             | Sum-up of a qualitative implementation study by Johnsen et al. 2020 [30]                     |
|                                                                              | How did main organizational barriers impact the intended mechanisms?                                                                                               | Sum-up of a qualitative implementation study by Johnsen et al. 2020 [32]                     |
