# Supplementary material for: Implementation, Mechanisms and Context of the MAMAACT Intervention to Reduce Ethnic and Social Disparity in Stillbirth and Infant Health
Source: MDPI journal article supplement (doi:10.3390/ijerph18168583), 2021-08-14
Supplement: s1 [file s1]

**Supplementary table S3.** The total number of received printed MAMA ACT leaflets and app downloads by language and per cluster in the intervention group from Nov. 2018 to May 2020

|                                            | W1 <sup>a</sup> | W2 <sup>a</sup> | W3 <sup>a</sup> | W4 <sup>a</sup> | W5 <sup>a</sup> | W6 <sup>a</sup> | W7 <sup>a</sup> | W8 <sup>a</sup> | W9 <sup>a</sup> | W10 <sup>a</sup> |
|--------------------------------------------|-----------------|-----------------|-----------------|-----------------|-----------------|-----------------|-----------------|-----------------|-----------------|------------------|
| <b>Number of received printed leaflets</b> |                 |                 |                 |                 |                 |                 |                 |                 |                 |                  |
| Danish                                     | 2900            | 4500            | 1640            | 5600            | 3300            | 4000            | 1900            | 2300            | 1600            | 1900             |
| English                                    | 300             | 400             | 250             | 700             | 300             | 450             | 200             | 350             | 200             | 200              |
| Arabic                                     | 70              | 200             | 150             | 200             | 200             | 250             | 100             | 200             | 80              | 120              |
| Turkish                                    | 50              | 50              | 100             | 180             | 50              | 100             | 70              | 80              | 80              | 50               |
| Somali                                     | 50              | 80              | 100             | 130             | 50              | 100             | 70              | 80              | 80              | 50               |
| Urdu                                       | 50              | 50              | 50              | 180             | 80              | 100             | 70              | 80              | 80              | 50               |
| Total                                      | 3420            | 5280            | 2290            | 6990            | 3980            | 5000            | 2410            | 3090            | 2120            | 2370             |
| <b>App downloads (woman)<sup>b</sup></b>   |                 |                 |                 |                 |                 |                 |                 |                 |                 |                  |
| Danish                                     | 467 (16.1)      | 565 (12.6)      | 211 (12.9)      | 993 (17.7)      | 506 (15.3)      | 338 (8.5)       | 222 (11.7)      | 243 (10.6)      | 323 (20.2)      | 316 (16.6)       |
| English                                    | 59 (19.7)       | 68 (17.0)       | 13 (5.2)        | 202 (28.9)      | 60 (20.0)       | 42 (9.3)        | 19 (9.5)        | 22 (6.3)        | 12 (6.0)        | 30 (15.0)        |
| Arabic                                     | 13 (18.6)       | 15 (7.5)        | 10 (6.7)        | 20 (10.0)       | 27 (13.5)       | 12 (4.8)        | 5 (5.0)         | 12 (6.0)        | 6 (7.5)         | 10 (8.3)         |
| Turkish                                    | 3 (6.0)         | 3 (3.8)         | 0 (0.0)         | 25 (13.9)       | 1 (2.0)         | 1 (1.0)         | 0 (0.0)         | 1 (1.3)         | 0 (0.0)         | 0 (0.0)          |
| Somali                                     | 3 (6.0)         | 3 (3.8)         | 0 (0.0)         | 4 (3.1)         | 0 (0.0)         | 1 (1.0)         | 0 (0.0)         | 1 (1.3)         | 0 (0.0)         | 1 (2.0)          |
| Urdu                                       | 1 (2.0)         | 0 (0.0)         | 0 (0.0)         | 21 (11.7)       | 2 (2.5)         | 1 (1.0)         | 1 (1.4)         | 0 (0.0)         | 0 (0.0)         | 0 (0.0)          |
| Total                                      | 546 (16.0)      | 654 (12.4)      | 234 (10.2)      | 1265 (18.1)     | 596 (15.0)      | 395 (7.9)       | 247 (10.2)      | 279 (9.0)       | 341 (16.1)      | 357 (15.1)       |
| <b>App downloads (partner)<sup>b</sup></b> |                 |                 |                 |                 |                 |                 |                 |                 |                 |                  |
| Danish                                     | 137 (4.7)       | 167 (3.7)       | 65 (4.0)        | 287 (5.1)       | 118 (3.6)       | 89 (2.2)        | 60 (3.2)        | 59 (2.6)        | 81 (5.1)        | 82 (4.3)         |
| English                                    | 12 (4.0)        | 22 (5.5)        | 5 (2.0)         | 69 (9.9)        | 20 (6.7)        | 12 (2.7)        | 7 (3.5)         | 10 (2.9)        | 5 (2.5)         | 12 (6.0)         |
| Arabic                                     | 4 (5.7)         | 5 (2.5)         | 4 (2.7)         | 7 (3.5)         | 6 (3.0)         | 5 (2.0)         | 1 (1.0)         | 5 (2.5)         | 1 (1.3)         | 1 (0.8)          |
| Turkish                                    | 0 (0.0)         | 0 (0.0)         | 0 (0.0)         | 7 (3.9)         | 1 (2.0)         | 0 (0.0)         | 0 (0.0)         | 1 (1.3)         | 0 (0.0)         | 0 (0.0)          |
| Somali                                     | 1 (2.0)         | 1 (1.3)         | 0 (0.0)         | 0 (0.0)         | 0 (0.0)         | 0 (0.0)         | 0 (0.0)         | 1 (1.3)         | 0 (0.0)         | 0 (0.0)          |
| Urdu                                       | 1 (2.0)         | 0 (0.0)         | 0 (0.0)         | 4 (2.2)         | 3 (3.8)         | 1 (1.0)         | 0 (0.0)         | 0 (0.0)         | 0 (0.0)         | 0 (0.0)          |
| Total                                      | 155 (4.5)       | 195 (3.7)       | 74 (3.2)        | 374 (5.4)       | 148 (3.7)       | 107 (2.1)       | 68 (2.8)        | 76 (2.5)        | 87 (4.1)        | 95 (4.0)         |

<sup>a</sup> Anonymized names of the ten maternity wards (clusters) included in the intervention group

<sup>b</sup> Numbers in parenthesis are the percentages of app downloads in relation to the number of received printed leaflets in the same language
