# Supplementary figures and images for: Implementation, Mechanisms and Context of the MAMAACT Intervention to Reduce Ethnic and Social Disparity in Stillbirth and Infant Health
Source: MDPI journal article supplement (doi:10.3390/ijerph18168583), 2021-08-14

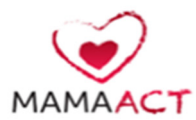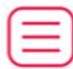

Select the symptom for more information

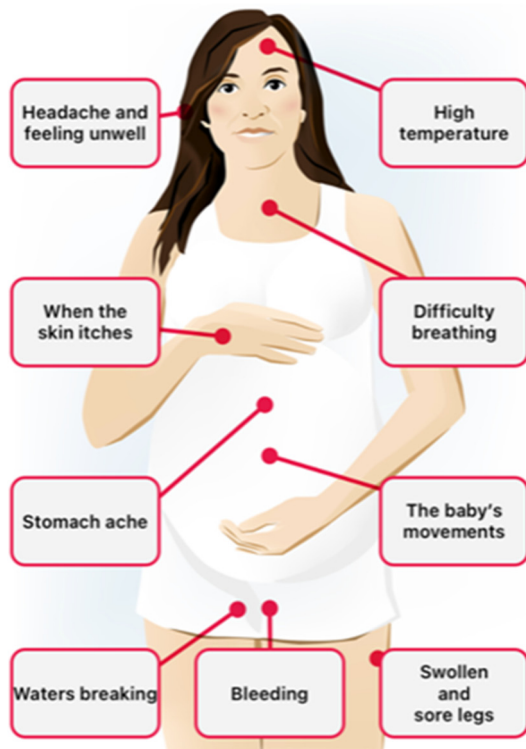

Supplementary Figure S1. The MAMA ACT app in English

Supplement: s1 [file s1]
